# Supplementary material for: How Far do Multiple Sources of Household Air Pollution matter? Explaining Obstructive Airway Disease among Older Adults in India
Source: Research Square preprint supplement (doi:10.21203/rs.3.rs-7795792/v1), 2025-10-08
Supplement: Supplementary file 1 [file 46a3687f704661759884a0cb.docx]

**Appendix**

**Table A.1: Background characteristics of respondents**

| Demographic characteristics | Active tuberculosis infection | Eye surgery | Abdominal surgery | Recent myocardial infarct | Pregnancy |
| --- | --- | --- | --- | --- | --- |
| **Age** | 2.90 | 0.24 | 0.37 | 0.49 | 0.24 |
| Less than 55 | 5.13 | 0.66 | 0.39 | 1.14 | 0 |
| 55-64 | 10.58 | 1.49 | 0.49 | 1.88 | 0 |
| 65+ |  |  |  |  |  |
|  |  |  |  |  |  |
| **Sex** |  |  |  |  |  |
| Male | 6.09 | 0.66 | 0.39 | 1.2 | 0 |
| Female | 5.52 | 0.76 | 0.43 | 0.98 | 0.24 |
|  |  |  |  |  |  |
| **Residence** |  |  |  |  |  |
| Rural | 5.81 | 0.66 | 0.37 | 0.88 | 0.26 |
| Urban | 5.68 | 0.84 | 0.49 | 1.45 | 0.21 |
|  |  |  |  |  |  |
| **Marital status** |  |  |  |  |  |
| Currently married | 4.79 | 0.58 | 0.43 | 0.96 | 0.23 |
| Widowed | 9.49 | 1.26 | 0.33 | 1.58 | 0.36 |
| Other | 5.9 | 0.79 | 0.45 | 0.69 | 0.17 |
|  |  |  |  |  |  |
| **Education** |  |  |  |  |  |
| No education | 7.12 | 0.77 | 0.37 | 0.93 | 0.21 |
| Less than 5 years | 6.3 | 0.84 | 0.4 | 1.29 | 0.23 |
| 5-9 years completed | 4.41 | 0.62 | 0.39 | 1.17 | 0.21 |
| 10 or more years completed | 3.83 | 0.66 | 0.55 | 1.19 | 0.35 |
|  |  |  |  |  |  |
| **MPCE quintile** |  |  |  |  |  |
| Low | 5.63 | 0.68 | 0.27 | 0.91 | 0.36 |
| Middle | 5.67 | 0.62 | 0.34 | 1.17 | 0.05 |
| High | 5.94 | 0.81 | 0.59 | 1.2 | 0.22 |
